# Supplementary material for: Targeting Epstein-Barr virus oncoprotein LMP1-mediated high oxidative stress suppresses EBV lytic reactivation and sensitizes tumors to radiation therapy
Source: PubMed Central journal article supplement (PMC7667690; doi:10.7150/thno.46006), 2020-10-25
Supplement: thnov10p11921s1.pdf [file thnov10p11921s1.pdf]

1 **Supplemental Materials**

2 **Table S1. The clinical characteristics of 95 patients with primary NPC diagnosis**

| <b>Characteristics</b>         | <b>No. of patients (%)</b> |
|--------------------------------|----------------------------|
| <b>Age, year (Range 15-84)</b> |                            |
| < 47                           | 46 (48.4)                  |
| ≥ 47                           | 49 (51.6)                  |
| <b>Gender</b>                  |                            |
| Male                           | 75 (78.9)                  |
| Female                         | 20 (21.1)                  |
| <b>T classification</b>        |                            |
| T1, T2                         | 12 (12.6)                  |
| T3, T4                         | 83 (87.4)                  |
| <b>N classification</b>        |                            |
| N0                             | 5 (5.3)                    |
| N1, N2, N3                     | 90 (94.7)                  |
| <b>M classification</b>        |                            |
| M0                             | 88 (92.6)                  |
| M1                             | 7 (7.4)                    |
| <b>Clinical stage</b>          |                            |
| II                             | 12 (12.6)                  |
| III                            | 42 (44.2)                  |
| IV                             | 41 (43.2)                  |

**WHO histological classification**

|          |           |
|----------|-----------|
| NKUC(UD) | 88 (92.6) |
| NKUC(DF) | 2 (2.1)   |
| Others   | 5 (5.3)   |

3

4 **Table S2. The clinical characteristics of 8 NP and 25 NPC patients**

|            | Clinical characteristics               | No. of patients (%) |
|------------|----------------------------------------|---------------------|
| <b>NP</b>  | <b>Age, year (Range 30-69)</b>         |                     |
|            | < 49                                   | 3 (37.5)            |
|            | ≥ 49                                   | 5 (62.5)            |
|            | <b>Gender</b>                          |                     |
|            | Male                                   | 5 (62.5)            |
|            | Female                                 | 3 (37.5)            |
| <b>NPC</b> | <b>Age, year (Range 35-73)</b>         |                     |
|            | < 48                                   | 9 (36.0)            |
|            | ≥ 48                                   | 16 (64.0)           |
|            | <b>Gender</b>                          |                     |
|            | Male                                   | 16 (64.0)           |
|            | Female                                 | 9 (36.0)            |
|            | <b>WHO histological classification</b> |                     |
|            | NKUC(UD)                               | 21 (84.0)           |
|            | NKUC(DF)                               | 4 (16.0)            |

5

6 **Table S3. The clinical characteristics of 30 NP and 92 NPC patients assessed by**7 **microarray**

|                    | <b>Clinical characteristics</b> | <b>No. of patients (%)</b> |
|--------------------|---------------------------------|----------------------------|
| <b>NP</b>          | <b>Age, year (Range 16-72)</b>  |                            |
|                    | < 39                            | 14 (46.7)                  |
|                    | ≥ 39                            | 16 (53.3)                  |
|                    | <b>Gender</b>                   |                            |
|                    | Male                            | 18 (60.0)                  |
|                    | Female                          | 12 (40.0)                  |
| <b>NPC</b>         | <b>Age, year (Range 25-68 )</b> |                            |
|                    | < 45                            | 44 (47.8)                  |
|                    | ≥ 45                            | 48 (52.2)                  |
|                    | <b>Gender</b>                   |                            |
|                    | Male                            | 71 (77.2)                  |
|                    | Female                          | 21 (22.8)                  |
|                    | <b>Neck lymph node</b>          |                            |
|                    | Negative                        | 37 (40.2)                  |
|                    | Positive                        | 40 (43.5)                  |
|                    | No information                  | 15 (16.3)                  |
| <b>EBER status</b> |                                 |                            |
| Negative           | 0                               |                            |

Positive

92 (100)

8

9 **Table S4. The clinical characteristics of 129 NPC patients assessed by microarray**

| <b>Clinical characteristics</b> | <b>No. of patients (%)</b> |
|---------------------------------|----------------------------|
| <b>Age, year (Range 20-82)</b>  |                            |
| ≤ 47                            | 67 (51.9)                  |
| > 47                            | 62 (48.1)                  |
| <b>Gender</b>                   |                            |
| Male                            | 100 (77.5)                 |
| Female                          | 29 (22.5)                  |
| <b>Neck lymph node</b>          |                            |
| Negative                        | 35 (27.1)                  |
| Positive                        | 94 (72.9)                  |
| <b>Recurrence</b>               |                            |
| Negative                        | 70 (54.3)                  |
| Positive                        | 58 (45.0)                  |
| No information                  | 1 (0.7)                    |
| <b>EBER</b>                     |                            |
| Negative                        | 2 (1.5)                    |
| Positive                        | 127 (98.5)                 |
| <b>Clinical stage</b>           |                            |
| I                               | 15 (11.6)                  |

|     |           |
|-----|-----------|
| II  | 56 (43.4) |
| III | 38 (29.5) |
| IV  | 20 (15.5) |

10

11 **Table S5. SiRNA sequence**

| siRNA            | Sequence              |
|------------------|-----------------------|
| <b>siNOX2 #1</b> | GGCCCAACTGGGATAATGA   |
| <b>siNOX2 #2</b> | GTCCCATGTTTCTGTATCT   |
| <b>siLMP1 #3</b> | CAUUGUUCUUGGAAUUGUTT  |
| <b>siLMP1 #4</b> | GGUAUCUGGAUCUACUUAUTT |

12

13 **Table S6. Primer sequences used in this study**

| Gene         | Forward Primer sequence  | Reverse primer sequence |
|--------------|--------------------------|-------------------------|
| <b>LMP1</b>  | CGTTATGAGTGACTGGACTGGA   | TGAACAGCACAATTCCAAGG    |
| <b>BARF1</b> | CAGGTTTCATCGCTCAGCTCC    | CATGGGAGATGTTGGCAGC     |
| <b>EBER1</b> | AGGACCTACGCTGCCCTAGA     | AAAACATGCGGACCACCAGC    |
| <b>BZLF1</b> | CATGTTTCAACCGCTCCGACTGG  | GCGCAGCCTGTCATTTTCAGATG |
| <b>BMRF1</b> | CTAGCCGTCCTGTCCAAGTGC    | AGCCAAACGCTCCTTGCCCA    |
| <b>NOX2</b>  | CCCTTTGGTACAGCCAGTGAAGAT | CAATCCCAGCTCCCCTAACATCA |
| <b>Nrf2</b>  | TACTCCCAGTTGCCCA         | CATCTACAAACGGGAATGTCTGC |
| <b>NQO1</b>  | CATTCTGAAAGGCTGGTTTGA    | CTAGCTTTGATCTGGTTGTCAG  |
| <b>SOD1</b>  | CTGAAGGCCTGCATGGATTC     | CCAAGTCTCCAACATGCCTCTC  |
| <b>XDH</b>   | AGGTGGACCACTTCAGCAAT     | GTTGGAGGGAAGGTTGGTTT    |

|                           |                           |                            |
|---------------------------|---------------------------|----------------------------|
| <b>GPX7</b>               | CCCACCACTTTAACGTGCTC      | GGCAAAGCTCTCAATCTCCTT      |
| <b>GPX8</b>               | CCGCCCAAGCAAGGAAGTAG      | TCTAACCAGAGCTGC TATGTCAG   |
| <b>β-actin</b>            | CCAAGGCCAACCGCGAGAAGATGAC | AGGGTACATGGTGGTGCCGCC AGAC |
| <b>BamHI-W region DNA</b> | GGGTGCAGTAACAGGTAATC      | ATTCGCCTCTAAAGTTTTGA       |
| <b>β-globin DNA</b>       | CTGGCAAATTGGATAAGGAGTCA   | TCCATCCTTTTATTTTCGAGCC     |

14

15 **Table S7. Correlation between 8-OHdG and EAD in 129 NPC patients**

|          |                | EAD    |                         |      |
|----------|----------------|--------|-------------------------|------|
| Biopsies | Spearman's rho | 8-OHdG | Correlation coefficient | .725 |
|          |                |        | Significance (2-tailed) | .000 |
|          |                |        | N                       | 129  |

16

17 **Table S8. Clinical characteristics and 8-OHdG level in 129 non-keratinizing**  
 18 **undifferentiated NPC patients who received radiation therapy**

| Clinical characteristics   | 8-OHdG Low level | 8-OHdG High level | p-value            |
|----------------------------|------------------|-------------------|--------------------|
| <b>Age (yr), mean±S.D.</b> | 49.33±10.95      | 46.94±11.83       | 0.374 <sup>a</sup> |
| <b>Gender</b>              |                  |                   | 0.87 <sup>b</sup>  |
| Male (n)                   | 51               | 49                |                    |
| Female (n)                 | 12               | 17                |                    |
| <b>Neck lymph node</b>     |                  |                   | 0.349 <sup>b</sup> |
| Negative (n)               | 20               | 15                |                    |
| Positive (n)               | 43               | 51                |                    |

**Recurrence** 0.000<sup>b</sup>

|                    |    |    |
|--------------------|----|----|
| Negative (n)       | 49 | 21 |
| Positive (n)       | 14 | 44 |
| No information (n) | 0  | 1  |

**Clinical Stage** 0.028<sup>b</sup>

|        |    |    |
|--------|----|----|
| I / II | 42 | 21 |
| III/IV | 29 | 47 |

19 <sup>a</sup> Welch's test

20 <sup>b</sup> Pearson's  $\chi^2$  test

21

22 **Table S9. Clinical characteristics and EAD level in 129 non-keratinizing**

23 **undifferentiated NPC patients who received radiation therapy**

| <b>Clinical characteristics</b> | <b>EAD Low level</b> | <b>EAD High level</b> | <b>p-value</b>     |
|---------------------------------|----------------------|-----------------------|--------------------|
| <b>Age (yr), mean±S.D.</b>      | 49.53±11.25          | 46.71±11.51           | 0.326 <sup>a</sup> |
| <b>Gender</b>                   |                      |                       | 0.558 <sup>b</sup> |
| Male (n)                        | 49                   | 51                    |                    |
| Female (n)                      | 15                   | 14                    |                    |
| <b>Neck lymph node</b>          |                      |                       | 0.589 <sup>b</sup> |
| Negative (n)                    | 17                   | 18                    | 0.589 <sup>b</sup> |
| Positive (n)                    | 47                   | 47                    |                    |
| <b>Recurrence</b>               |                      |                       | 0.000 <sup>b</sup> |

Negative (n) 45 25

Positive (n) 19 39

No information (n) 0 1

**Clinical Stage** 0.011<sup>b</sup>

I / II 42 29

III/IV 22 36

24 <sup>a</sup> Welch's test

25 <sup>b</sup> Pearson's  $\chi^2$  test

26

27 **Table S10. Clinical characteristics and 8-OHdG level in 92 non-keratinizing**

28 **undifferentiated NPC patients who received radiation therapy**

| Clinical characteristics   | 8-OHdG      |            | p-value            |
|----------------------------|-------------|------------|--------------------|
|                            | Low level   | High level |                    |
| <b>Age (yr), mean±S.D.</b> | 44.52±10.60 | 45.09±8.69 | 0.780 <sup>a</sup> |
| <b>Gender</b>              |             |            |                    |
| Male (n)                   | 35          | 36         | 0.804 <sup>b</sup> |
| Female (n)                 | 11          | 10         |                    |
| <b>Neck lymph node</b>     |             |            |                    |
| Negative (n)               | 21          | 16         | 0.303 <sup>b</sup> |
| Positive (n)               | 18          | 22         |                    |
| No information (n)         | 7           | 8          |                    |

29 <sup>a</sup> Welch's test

30 <sup>b</sup> Pearson's  $\chi^2$  test



31  
32  
33  
34  
35  
36  
37  
38  
39  
40  
41  
42  
43

**Table S11. Clinical characteristics and EAD level in 92 non-keratinizing undifferentiated NPC patients who received radiation therapy**

| <b>Clinical characteristics</b> | <b>EAD Low level</b> | <b>EAD High level</b> | <b>p-value</b>     |
|---------------------------------|----------------------|-----------------------|--------------------|
| <b>Age (yr), mean±S.D.</b>      | 44.28±10.17          | 45.33±9.17            | 0.607 <sup>a</sup> |
| <b>Gender</b>                   |                      |                       |                    |
| Male (n)                        | 35                   | 36                    | 0.804 <sup>b</sup> |
| Female (n)                      | 11                   | 10                    |                    |
| <b>Neck lymph node</b>          |                      |                       |                    |
| Negative (n)                    | 21                   | 16                    | 0.417 <sup>b</sup> |
| Positive (n)                    | 19                   | 21                    |                    |
| No information (n)              | 6                    | 9                     |                    |

<sup>a</sup> Welch's test

<sup>b</sup> Pearson's  $\chi^2$  test

44 **Supplemental Figures and Figure Legends**

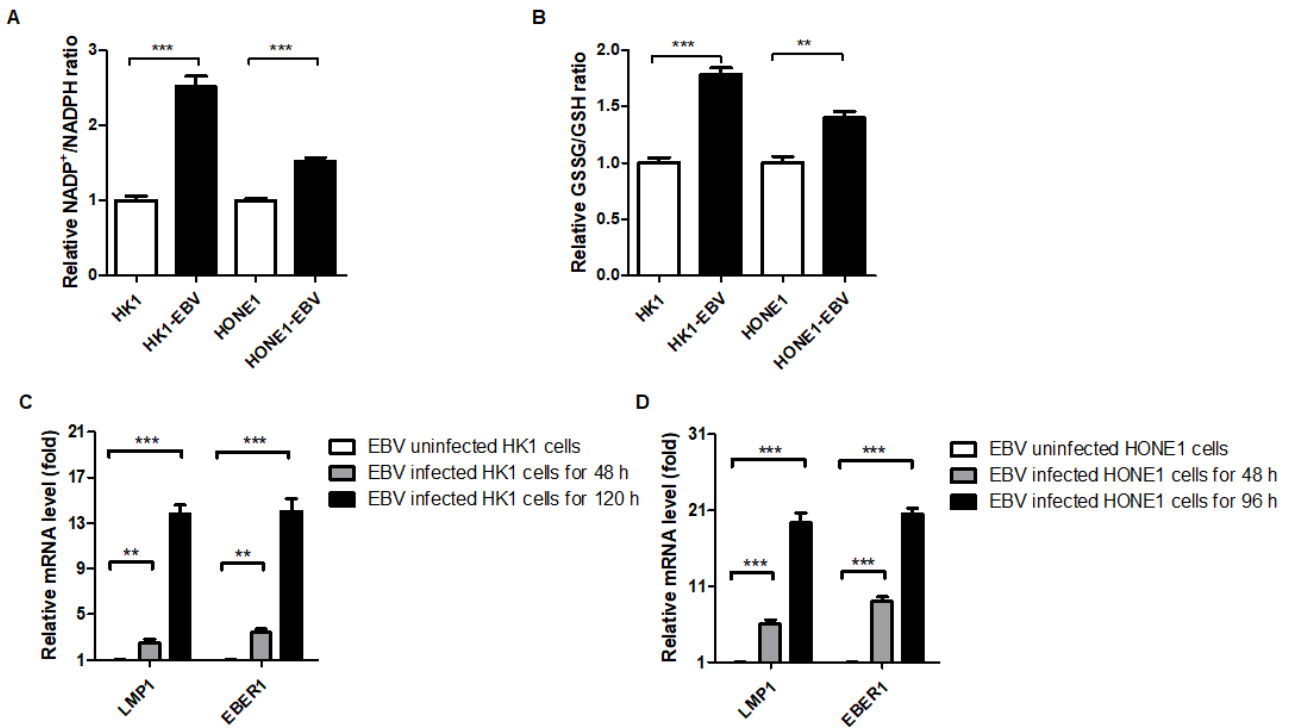

45

46 **Figure S1. EBV induces high oxidative stress in NPC cells and patients. (A)** Intracellular  
 47 NADP<sup>+</sup>/NADPH levels were assayed using an NADP<sup>+</sup>/NADPH assay kit. Data are shown as  
 48 means ± S.D.; n = 3; \*\*\**p* < 0.001. **(B)** Total glutathione (GSH) and oxidized glutathione (GSSG)  
 49 were measured using a GSH/GSSG assay kit. Data are shown as means ± S.D.; n = 3; \*\**p* <  
 50 0.01, \*\*\**p* < 0.001. **(C)** The infection in HK1 cells was assessed by the detection of EBV genes  
 51 (LMP1 and EBER1) by qPCR. Data are shown as means ± S.D.; n = 3; \*\**p* < 0.01, \*\*\**p* <  
 52 0.001. **(D)** The infection in HONE1 cells was assessed by the detection of EBV genes (LMP1  
 53 and EBER1) by qPCR. Data are shown as means ± S.D.; n = 3; \*\**p* < 0.01, \*\*\**p* < 0.001.

54

55

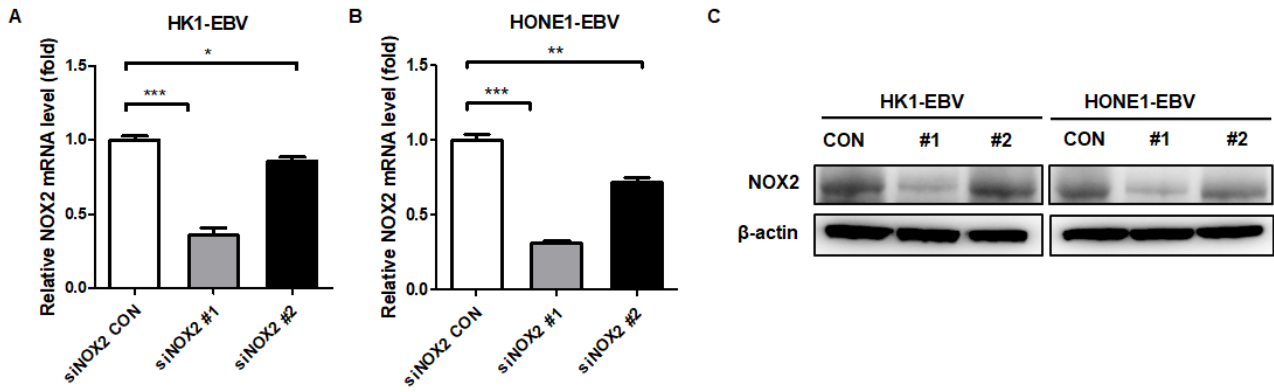

56

57 **Figure S2. The NOX2 knockdown efficiency by siRNA transfection was detected by**  
 58 **qPCR and Western blot. (A-B)** The mRNA levels of *NOX2* after siRNA transfection were  
 59 detected by RT-PCR. Data are shown as means  $\pm$  S.D.;  $n = 3$ ;  $*p < 0.05$ ,  $**p < 0.01$ ,  $***p <$   
 60  $0.001$ . **(C)** NOX2 protein expression was detected by Western blot analysis and  $\beta$ -actin was  
 61 used as an internal control.

62

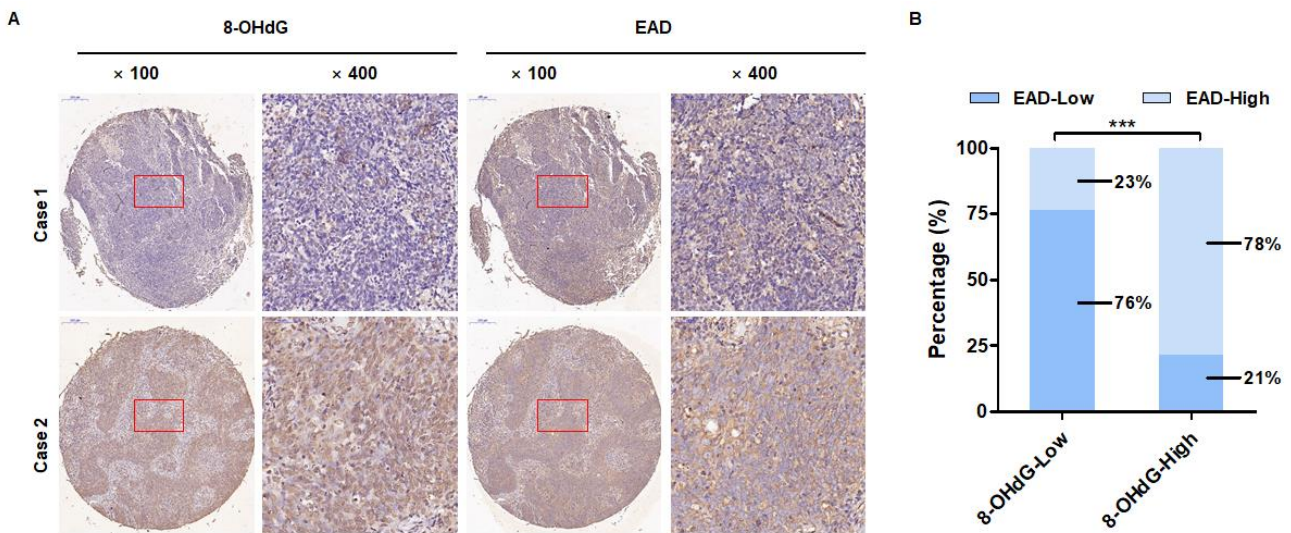

63

64 **Figure S3. 8-OHdG expression was positively correlated with EAD in human NPC**  
 65 **patients. (A)** Representative IHC photographs showing the expression of 8-OHdG and EAD  
 66 in consecutive sections of NPC microarrays (HNasN129Su01, Shanghai, China). **(B)** EAD  
 67 level is calculated based on 8-OHdG expression in NPC microarrays ( $***p < 0.001$ ).

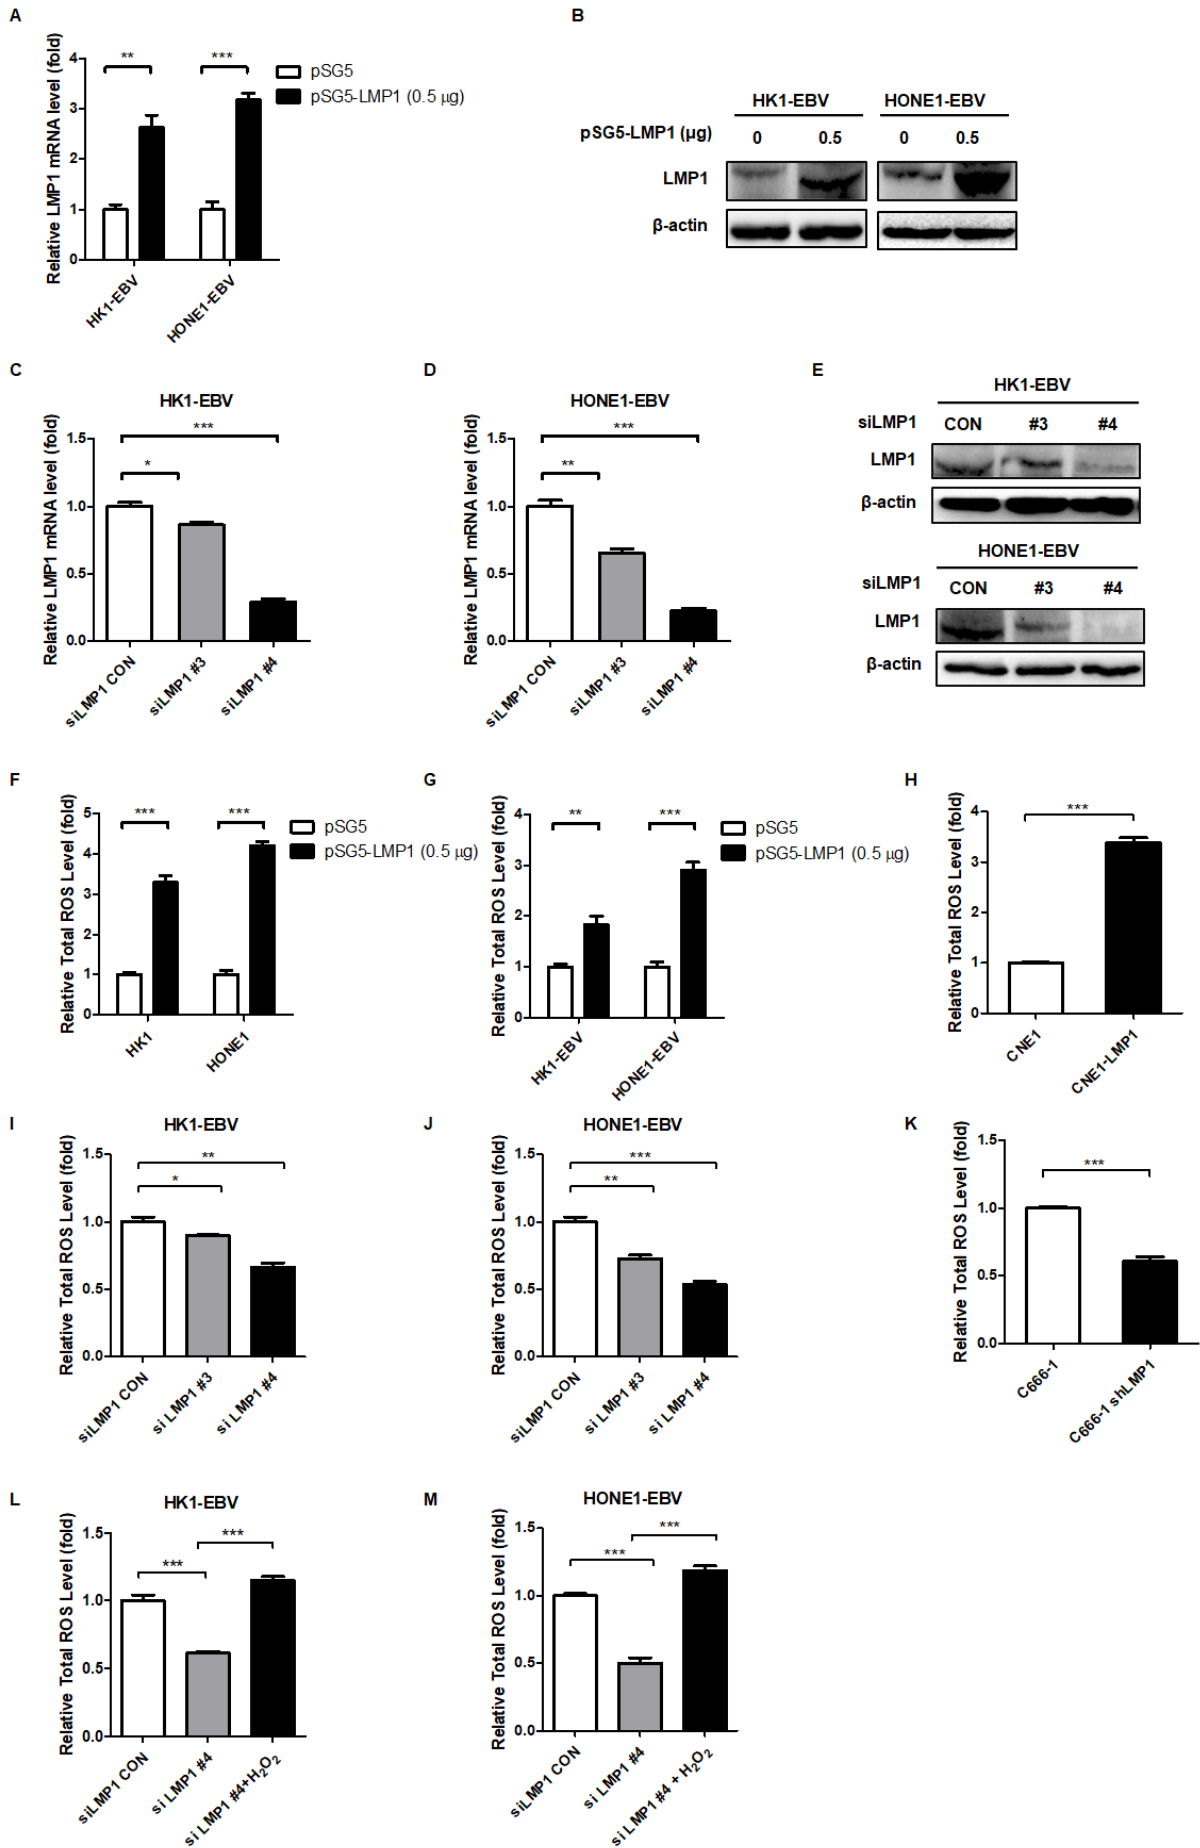

69 **Figure S4. LMP1 promotes the production of ROS.** The LMP1 overexpression and  
70 knockdown efficiency was detected by qPCR and Western blot. **(A)** The mRNA levels of  
71 *LMP1* after pSG5-LMP1 plasmid transfection were detected by qPCR. Data are shown as  
72 means  $\pm$  S.D.; n = 3; \*\* $p$  < 0.01, \*\*\* $p$  < 0.001. **(B)** LMP1 protein expression after pSG5-LMP1  
73 plasmid transfection was detected by Western blot analysis and  $\beta$ -actin was used as an  
74 internal control. **(C-D)** The mRNA levels of *LMP1* after siLMP1 transfection were detected by  
75 qPCR. Data are shown as means  $\pm$  S.D.; n = 3; \* $p$  < 0.05, \*\* $p$  < 0.01, \*\*\* $p$  < 0.001. **(E)** LMP1  
76 protein expression was detected by Western blot analysis and  $\beta$ -actin was used as an internal  
77 control. **(F-G)** LMP1 induces ROS generation. EBV cells were transfected with pSG5 and  
78 pSG5-LMP1 plasmids and total ROS levels were detected. Data are shown as means  $\pm$  S.D.;  
79 n = 3; \*\* $p$  < 0.01, \*\*\* $p$  < 0.001. **(H)** The total ROS levels in CNE1 and LMP1 stable  
80 overexpression cell line CNE1-LMP1 were detected. Data are shown as means  $\pm$  S.D.; n =  
81 3; \*\*\* $p$  < 0.001. **(I-J)** LMP1 knockdown decreases ROS generation. HK1-EBV and HONE1-  
82 EBV cells were transfected with LMP1 siRNA pool and total ROS levels were detected. Data  
83 are shown as means  $\pm$  S.D.; n = 3; \* $p$  < 0.05, \*\* $p$  < 0.01, \*\*\* $p$  < 0.001. **(K)** The total ROS  
84 levels in C666-1 and LMP1 stable cell line C666-1 shLMP1 were detected. Data are shown  
85 as means  $\pm$  S.D.; n = 3; \*\*\* $p$  < 0.001. **(L-M)** HK1-EBV and HONE1-EBV cells were transfected  
86 with LMP1 siRNA pool or negative siRNA, then H<sub>2</sub>O<sub>2</sub> was added to recover the ROS levels  
87 and the ROS levels were detected. Data are shown as means  $\pm$  S.D.; n = 3; \*\*\* $p$  < 0.001.  
88  
89

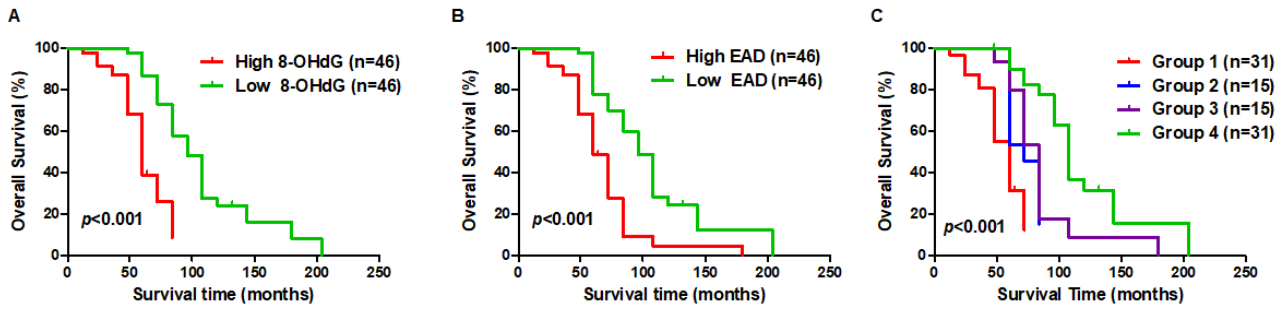

90

91 **Figure S5. High oxidative stress and high EBV lytic reactivation are positively**

92 **associated with poor survival in NPC patients. (A)** A high expression level of 8-OHdG is

93 associated with poor overall survival in NPC after radiation therapy. Overall survival rates of

94 NPC patients after radiation therapy with low (n = 46) or high (n = 46) expression levels of 8-

95 OHdG were estimated using the Kaplan–Meier method by log-rank test ( $p < 0.001$ ). **(B)** A

96 high expression level of EAD is associated with poor overall survival in NPC after radiation

97 therapy. Overall survival rates of NPC patients after radiation therapy with low (n = 46) or high

98 (n = 46) expression levels of EAD were estimated using the Kaplan–Meier method by log-

99 rank test ( $p < 0.001$ ). **(C)** Cumulative overall survival curves of the combination of 8-OHdG

100 and EAD. NPC patients were classified into 4 groups based on 8-OHdG and EAD expression:

101 Group 1 (n = 31): high 8-OHdG and EAD expression; Group 2 (n = 15): high 8-OHdG but low

102 EAD expression; Group 3 (n = 15): low 8-OHdG but high EAD expression; Group 4 (n = 31):

103 low 8-OHdG and EAD expression ( $p < 0.001$ ).

104

105

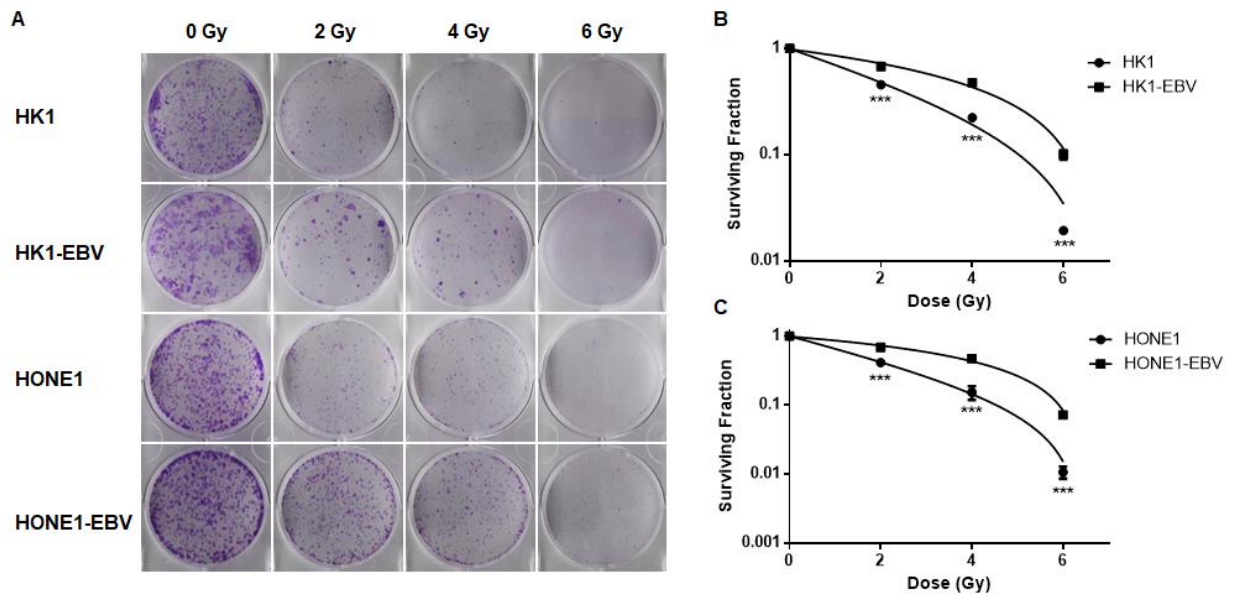

106

107 **Figure S6. EBV positive cells were resistant to radiation therapy than EBV negative**

108 **cells. (A)** Colony formation of EBV negative and EBV-positive cells with a single dose of 0,

109 2, 4 or 6 Gy irradiation. **(B-C)** Survival curve of EBV negative and EBV positive cells after a

110 single dose of 0, 2, 4 or 6 Gy irradiation. Surviving fractions were calculated by comparing

111 the colony number of each treatment group with untreated groups (0 Gy). Results are plotted

112 as the mean surviving fraction  $\pm$  S.D. The survival curves were drawn using the GraphPad

113 Prism 5 software program, \*\*\* $p < 0.001$ .

114
